## Distribution and Postnatal Development of *Gpr54* Gene Expression in Mouse Brain and Gonadotropin-Releasing Hormone Neurons

Allan E. Herbison, Xavier d'Anglemont de Tassigny, Joanne Doran, and William H. Colledge

Centre for Neuroendocrinology (A.E.H.), Department of Physiology, University of Otago School of Medical Sciences, Dunedin 9054, New Zealand; and Reproductive Physiology Group (A.E.H., X.d.A.d.T., J.D., W.H.C.), Department of Physiology, Development, and Neuroscience, University of Cambridge, Cambridge CB2 3EG, United Kingdom

Kisspeptin and G protein-coupled receptor 54 (GPR54) are now acknowledged to play essential roles in the neural regulation of fertility. Using a transgenic *Gpr54* LacZ knock-in mouse model, this study aimed to provide 1) a detailed map of cells expressing *Gpr54* in the mouse brain and 2) an analysis of *Gpr54* expression in GnRH neurons across postnatal development. The highest density of *Gpr54*-expressing cells in the mouse central nervous system was found in the dentate gyrus of the hippocampus beginning on postnatal d 6 (P6). Abundant *Gpr54* expression was also noted in the septum, rostral preoptic area (rPOA), anteroventral nucleus of the thalamus, posterior hypothalamus, periaqueductal grey, supramammillary and pontine nuclei, and dorsal cochlear nucleus. No *Gpr54* expression was detected in the arcuate and rostral periventricular nuclei of the hypothalamus. Dual-labeling experiments showed that essentially all *Gpr54*-expressing cells in the rPOA were GnRH neurons. Analyses of mice at birth, P1, P5, P20, and P30 and as adults revealed a gradual increase in the percentage of GnRH neurons expressing *Gpr54* from approximately 40% at birth through to approximately 70% from P20 onward. Whereas GnRH neurons located in the septum displayed a consistent increase across this time, GnRH neurons in the rPOA showed a sharp reduction in *Gpr54* expression after birth (to ~10% at P5) before increasing to the 70% expression levels by P20. Together these findings provide an anatomical basis for the exploration of *Gpr54* actions outside the reproductive axis and reveal a complex temporal and spatial pattern of *Gpr54* gene expression in developing GnRH neurons. (*Endocrinology* 151: 312–321, 2010)

Kisspeptin and G protein-coupled receptor 54 (GPR54) are now established as key signaling partners in the neural pathway controlling gonadotropin secretion. Unequivocal data demonstrate that kisspeptin neurons directly control the activity of the GnRH neurons (1) and that kisspeptin-*Gpr54* signaling plays a prominent role in puberty onset and ovulation (2, 3). However, it seems likely that kisspeptin and/or *Gpr54* are also involved in regulating the activity of neurons outside the GnRH neuronal network. Roles for kisspeptin and *Gpr54* have been suggested in the process of brain sexual differentiation (4), control of oxytocin secretion (5), and hippocampal excit-

ability (6). Although information is presently accruing on the distribution of kisspeptin neurons and their projections (7, 8), little headway has been made in determining the locations of *Gpr54* expression in the brain.

The initial reports identifying the orphan receptor GPR54 provided some information on its distribution within the human nervous system with several brain regions identified by RT-PCR to express GPR54 mRNA (5, 9). Using *in situ* hybridization in the rat, Lee and colleagues reported that *Gpr54* mRNA was predominant in limbic brain regions including the hypothalamus, hippocampus, and periaqueductal gray (PAG) (10). How-

ISSN Print 0013-7227 ISSN Online 1945-7170  
Printed in U.S.A.

Copyright © 2010 by The Endocrine Society  
doi: 10.1210/en.2009-0552 Received May 14, 2009. Accepted October 19, 2009.  
First Published Online December 4, 2009

Abbreviations: AHA, Anterior hypothalamic area; GPR54, G protein-coupled receptor 54; LS, lateral septum; MS, medial septum; P25, postnatal d 25; PAG, periaqueductal gray; rPOA, rostral preoptic area; RP3V, rostral periventricular area of the third ventricle; TBS, Tris-buffered saline.

ever, that study provided only four low-power micrographs of hybridized sections, and there has been no detailed anatomical description of *Gpr54* expression in any species to date. More recent *Gpr54* mRNA *in situ* hybridization studies have concentrated solely on identifying its presence in GnRH neurons (11, 12).

The issue of defining *Gpr54*-expressing cells is not trivial because its expression at a cellular level is low (12, 13), and the development of specific antisera with sufficient sensitivity will likely be difficult. One strategy for defining the distribution of low-abundance G protein-coupled receptors has been to use transgenic mice in which reporter molecules such as  $\beta$ -galactosidase have been knocked in to the gene of interest (14–16). By using hemizygous mice that exhibit a normal phenotype, the distribution of cells transcribing the molecule of interest can be assessed with Xgal histochemistry, in the case of the *LacZ* reporter, and coupled with immunocytochemistry to assess expression patterns in specific cell types. This strategy has been used successfully to show that approximately 55% of GnRH neurons are actively transcribing *Gpr54* in adult mice (17).

The present investigation aimed to address two issues: first, to provide a detailed mapping of *Gpr54* gene expression in the mouse brain and, second, to address the postnatal development of *Gpr54* gene expression in GnRH neurons and the brain. The first goal aimed to provide clarity to the potential neuronal networks regulated by kisspeptin/*Gpr54* in the central nervous system. The second goal aimed to establish when GnRH neurons begin to express *Gpr54* after birth. Immunocytochemical studies show that kisspeptin fibers exist in the vicinity of GnRH neuron cell bodies from postnatal d 25 (P25) onward (18), and we have proposed that the innervation of GnRH cell bodies by kisspeptin neurons of the rostral periventricular area of the third ventricle (RP3V) is the limiting step in the final activation of GnRH neurons at puberty (19). However, dual *in situ* data (12) indicate that *Gpr54* transcripts are expressed by GnRH neurons at P18, well before kisspeptin fibers are seen around GnRH neurons. Furthermore, there is a suggestion that kisspeptin-*Gpr54*-GnRH neuron signaling is involved in the process of brain sexual differentiation in the perinatal period (20). Hence, we were curious to establish precisely when GnRH neurons begin to express *Gpr54* after birth and, hence, become potential targets for kisspeptin regulation.

## Materials and Methods

### Animals

*Gpr54*-mutant mice (21) were housed under conditions of 12 h light (lights on at 0600 h) with *ad libitum* access to food and water. In this transgenic line, an IRES-*LacZ* cassette replaces the coding exons for *Gpr54* and allows expression of the *Gpr54* to

be visualized by histochemical Xgal staining for  $\beta$ -galactosidase, the product of *LacZ*. Heterozygote mating pairs were established for each line and time mated. Offspring were taken for experiments at birth (within 60 min of delivery), P1 (10–12 h old), P5, P20, and P30 and as adult (>60 d of age). The estrous cycle stage of adult female mice was assessed by vaginal smears, and mice were used for experiments on diestrus. Mice were genotyped by PCR as reported previously (21) before (P20 and older) or after (birth, P1, and P5) death, and hemizygous *Gpr54*-mutant mice were used. Sex of mice taken at birth, P1, and P5 was assessed by PCR for *Sry*. All experimental protocols were performed under the authority of a United Kingdom Home Office Project License and were approved by the Cambridge Animal Ethics Committee.

## Xgal histochemistry and GnRH immunocytochemistry

### Neonatal mice

Mice investigated at birth and P1 were decapitated, and their brains were carefully removed and placed in a 4% paraformaldehyde, phosphate-buffered solution (pH 7.6) for 4 h at room temperature. Mice examined at P5 were killed by cervical spinal dislocation and brains removed and treated as above. Coronal sections throughout the forebrain were then cut on a vibratome at 50–60  $\mu$ m thickness in a 1:3 series. All sections were washed in Tris-buffered saline (TBS) and placed in 2% Xgal solution (2 mM  $\text{MgCl}_2$ ; 4 mM  $\text{K}_3\text{Fe}(\text{CN})_6$ ; 4 mM  $\text{K}_4\text{Fe}(\text{CN})_6$ ; 4 mg/ml 5-bromo-4-chloro-3-indoyl- $\beta$ -D-galactosidase) overnight at room temperature. After TBS washes, 1 set of sections was counterstained with Neutral Red 1% wt/vol and mounted on slides. The remaining two sets of Xgal-stained sections were placed in 3% hydrogen peroxide/TBS solution for 5 min to quench endogenous peroxidase activity and washed three times in TBS. Sections were incubated for 48 h at 4 C in a polyclonal rabbit antibody against GnRH (1:3000; provided by Prof. G. Tramu, University of Bordeaux) (22) in TBS containing 0.3% Triton X-100, 0.25% BSA, and 2% normal goat serum. Sections were then washed and incubated with biotinylated goat antirabbit Ig (1:400; Vector Laboratories, Burlingame, CA) for 90 min at room temperature and then washed and placed in Vector Elite avidin-peroxidase (1:100; Vector) for 90 min at room temperature. Immunoreactivity was revealed using glucose oxidase-reacted diaminobenzidine hydrochloride (DAB). Brain sections were placed on slides and coverslipped using an aqueous mountant Hydromount (HS-106; National Diagnostics).

### Peripubertal and adult mice

Mice investigated at P20 and P30 and as adults were anesthetized with 0.05–0.01 ml Doletal 20% (Vétoquinol, Lure, France) and perfused through the heart with 10 ml (P20) or 15 ml (P30 and adult) of 4% paraformaldehyde, phosphate-buffered solution (pH 7.6). Brains were removed and postfixed in the same fixative solution for 1 h before being cut on a vibratome in the coronal plane as described above, but at 30  $\mu$ m thickness. Sections were placed in Xgal and two sets immunoreacted for GnRH as described above. Because the neonatal tissue is somewhat fragile, sections from P5 or younger mice were cut at 50–60  $\mu$ m thickness, whereas older than P5 tissue was cut at 30  $\mu$ m. Previous studies undertaken on adult tissue has shown that the same Xgal-GnRH neuron dual labeling occurs in 30- and 60- $\mu$ m-thick sections.

Controls consisted of the use of genotyped wild-type mice at different age groups and the omission of the primary antibody from the GnRH immunocytochemistry protocol. Previous studies have demonstrated the specificity of the GnRH antibody for GnRH1 (22). No Xgal staining was observed in wild-type mice, and no GnRH staining was observed when the primary antibody was omitted.

## Analysis

Sets of coronal brain sections were examined on an Olympus BX51 microscope at  $\times 10$ – $40$  objective power. Sections from adult male and female mice were matched with plates from the Franklin and Paxinos mouse atlas (23) to provide schematic diagrams of *Gpr54* gene expression in the adult brain. The numbers of Xgal-expressing cells in specific brain regions were assessed across postnatal development by examining Neutral Red-counterstained forebrain sections and scoring them as follows: +, fewer than 10; ++, 10–100; +++, 100–1000; and +++, more than 1000. Dual-label Xgal-GnRH sections were analyzed by counting all GnRH neurons in two sections at three different levels [medial septum (MS), plate 22; rostral preoptic area (rPOA), plate 27; and anterior hypothalamic area (AHA), plate 32], as detailed previously (24), in each mouse. Brown, diaminobenzidine hydrochloride-labeled GnRH neurons were considered to be positive for *Gpr54* if the blue Xgal reaction product was found within the cytoplasm of the soma or proximal dendrite. For each mouse, mean total GnRH neuron counts and GnRH neuron+Xgal values and percentage were generated and used to provide age group means. Statistical analysis comparing between age groups was undertaken using ANOVA with *post hoc* Student-Newman-Keuls for multiple comparisons. Statistical analysis comparing different GnRH neuron populations in the same brains was undertaken with the paired *t* test.

## Results

### Distribution of *Gpr54* in adult mouse brain

Xgal histochemistry revealed a heterogeneous pattern of *Gpr54* gene expression in the brain (Fig. 1). The blue Xgal reaction product is found predominantly as one or more dot- or donut-like structures within the cytoplasm of the expressing cell (25–27). The location of the donuts within the cell is not indicative of the subcellular localization of the protein being examined.

The most highly concentrated population of Xgal-containing cells was found in the dentate gyrus of the hippocampus (Fig. 1A) with cells located in the molecular, granule, and polymorphic layers. Elsewhere in the hippocampus, Xgal was detected only in the pyramidal layer of the CA3 (Figs. 1B and 2).

Within the hypothalamus, Xgal was restricted to GnRH neurons (Figs. 2 and 3) and a population of cells located in the periventricular region of the posterior hypothalamus (Fig. 2). Notably, we found no evidence for Xgal in the RP3V or arcuate nucleus. Anatomically, the closest Xgal population to GnRH neurons was found in the lateral septum (LS) and MS (Fig. 2). At rostral levels of

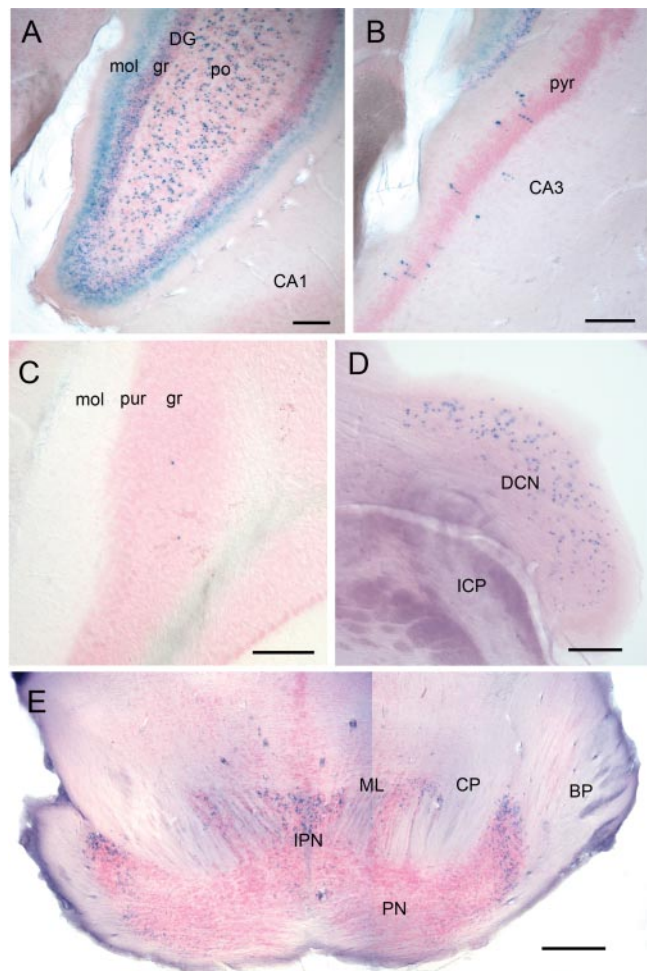

**FIG. 1.** Distribution of *Gpr54*-expressing cells in adult diestrous female mouse brain. Photographs show Xgal-expressing cells (blue) with Neutral Red counterstain in dentate gyrus of hippocampus (A), pyramidal cell layer of CA3 hippocampus (B), granule cell layer of cerebellum (C), dorsal cochlear nucleus (D), and pontine nuclei (E). BP, brachium pontis; CP, cerebellar peduncle; DCN, dorsal cochlear nucleus; DG, dentate gyrus; gr, granule cell layer; ICP, inferior cerebellar peduncle; IPN, interpeduncular nucleus; ML, medial lemniscus; mol, molecular layer; PN, pontine nucleus; po, polymorphic cell layer; pyr, pyramidal cell layer; pur, Purkinje cell layer. Scale bars, 250  $\mu$ m (A and E) and 100  $\mu$ m (B–D).

the septum, there was a complete intermingling of GnRH- and non-GnRH Xgal-positive cells (Figs. 2 and 3D), whereas more caudally, occasional Xgal-positive cells of the intermediate division of the LS flanked GnRH neurons located in the vertical limb of the diagonal band of Broca and rPOA (Fig. 3B).

Outside of the hippocampus and hypothalamus, Xgal-positive cells were clustered in discrete brain regions throughout the central nervous system. These areas are best viewed on Fig. 2 and, notably, include the anteroventral nucleus of the thalamus, PAG, supramammillary nuclei, interpeduncular and pontine and reticulotegmental nuclei (Fig. 1E), superior colliculus, dorsal tegmental nuclei, dorsal cochlear nucleus (Fig. 1D), and cuneate nu-



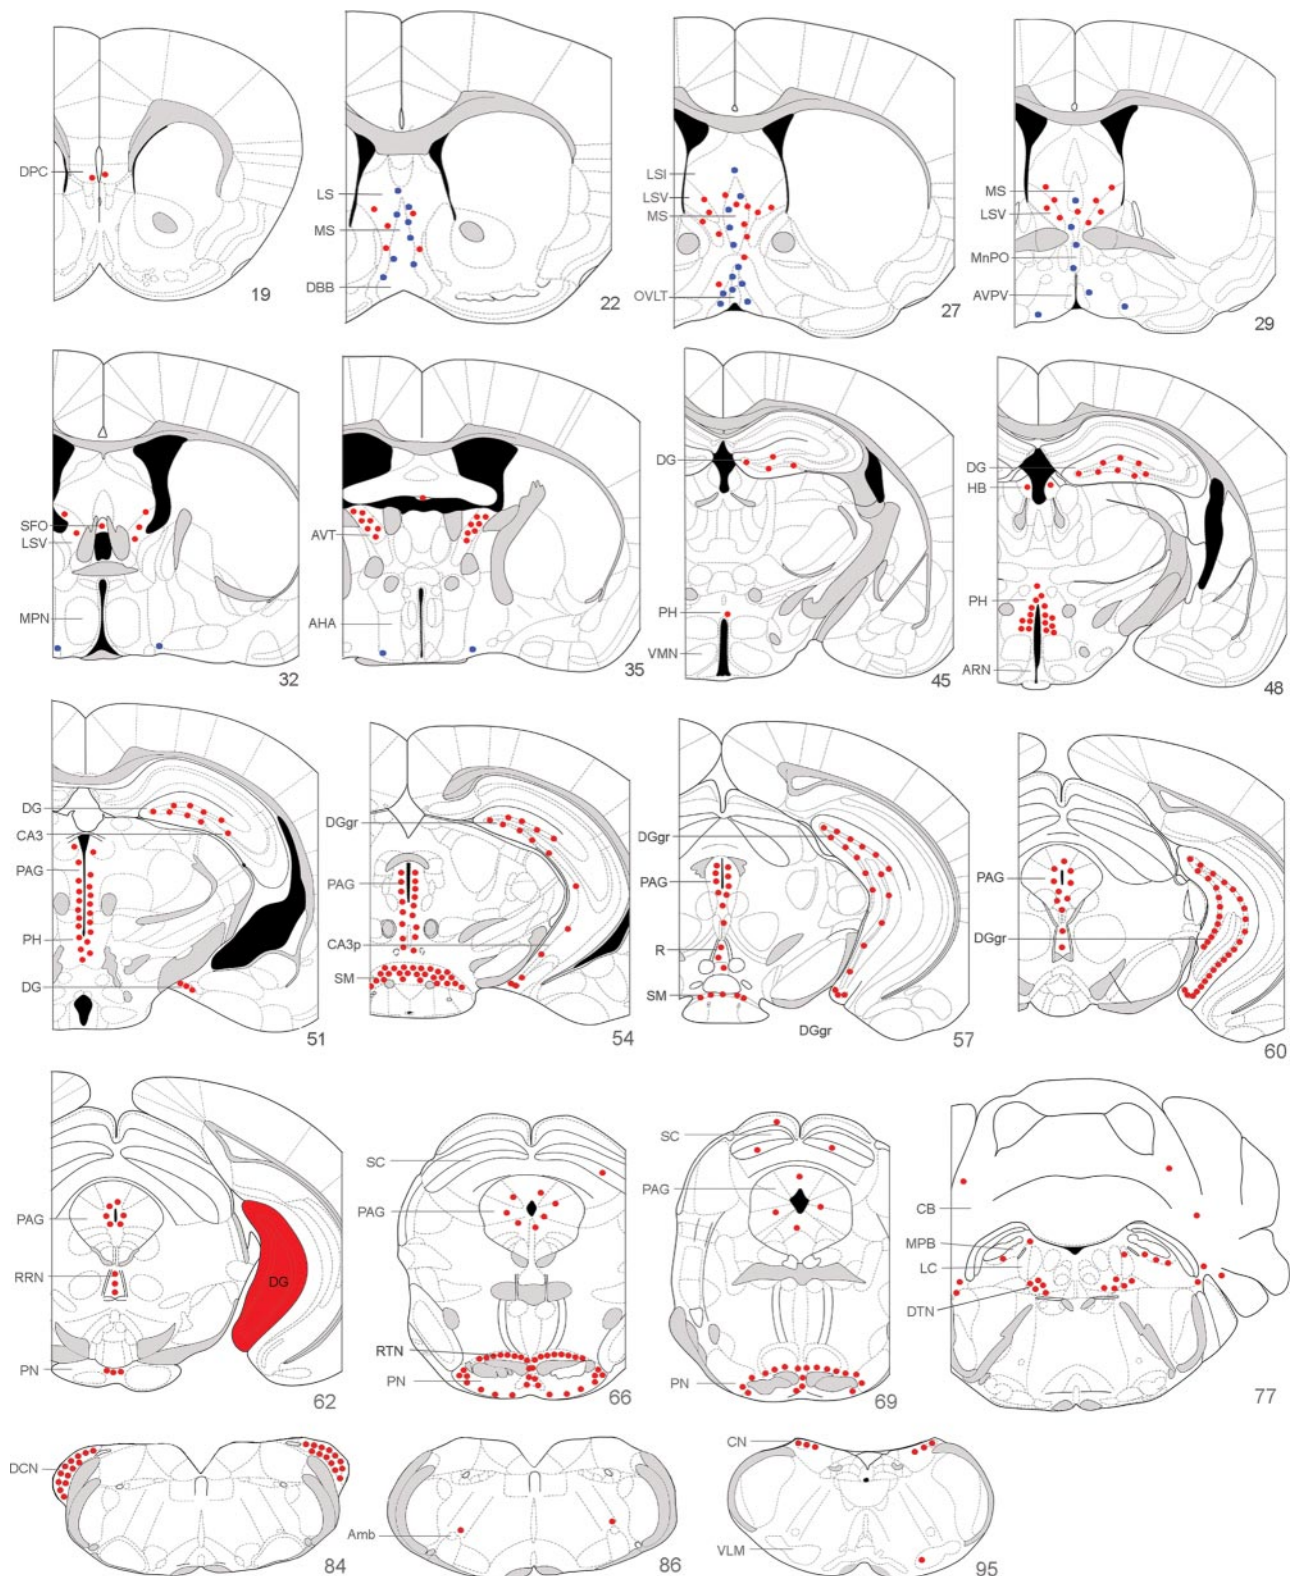

**FIG. 2.** Schematic diagrams showing distribution of Gpr54-expressing cells throughout the adult female mouse central nervous system. *Red dots*, Locations of Xgal-containing cells. *Blue dots*, Xgal-containing GnRH neurons. The high density of Xgal cells in the dentate gyrus is represented by *solid red*. Diagrams are adapted from Paxinos and Franklin (41) with permission (plate numbers at *bottom right* for each schematic). Amb, Nucleus ambiguus; ARN, arcuate nucleus; AVT, anteroventral nucleus of thalamus; AVPV, anteroventral periventricular nucleus; CA3p, pyramidal cell layer CA3 hippocampus; CB, cerebellum; CN, cuneate nucleus; DBB, diagonal band of Broca; DCN, dorsal cochlear nucleus; DG, dentate gyrus; DGgr, granule cell layer of dentate gyrus; DPC, dorsal peduncular nucleus of cortex; DTN, dorsal tegmental nucleus; HB, habenula; LC, locus coeruleus; LSI, intermediate division of LS; LSV, ventral division of LS; MPB, medial parabrachial nucleus; MPN, median preoptic nucleus; OVLT, organum vasculosum of lamina terminalis; PH, posterior hypothalamus; PN, pontine nucleus; R, raphe; RRN, rostral raphe nuclei; RTN, reticulotegmental nuclei; SC, superior colliculus; SFO, subfornical organ; SM, supramammillary nuclei; VMN, ventromedial nucleus.

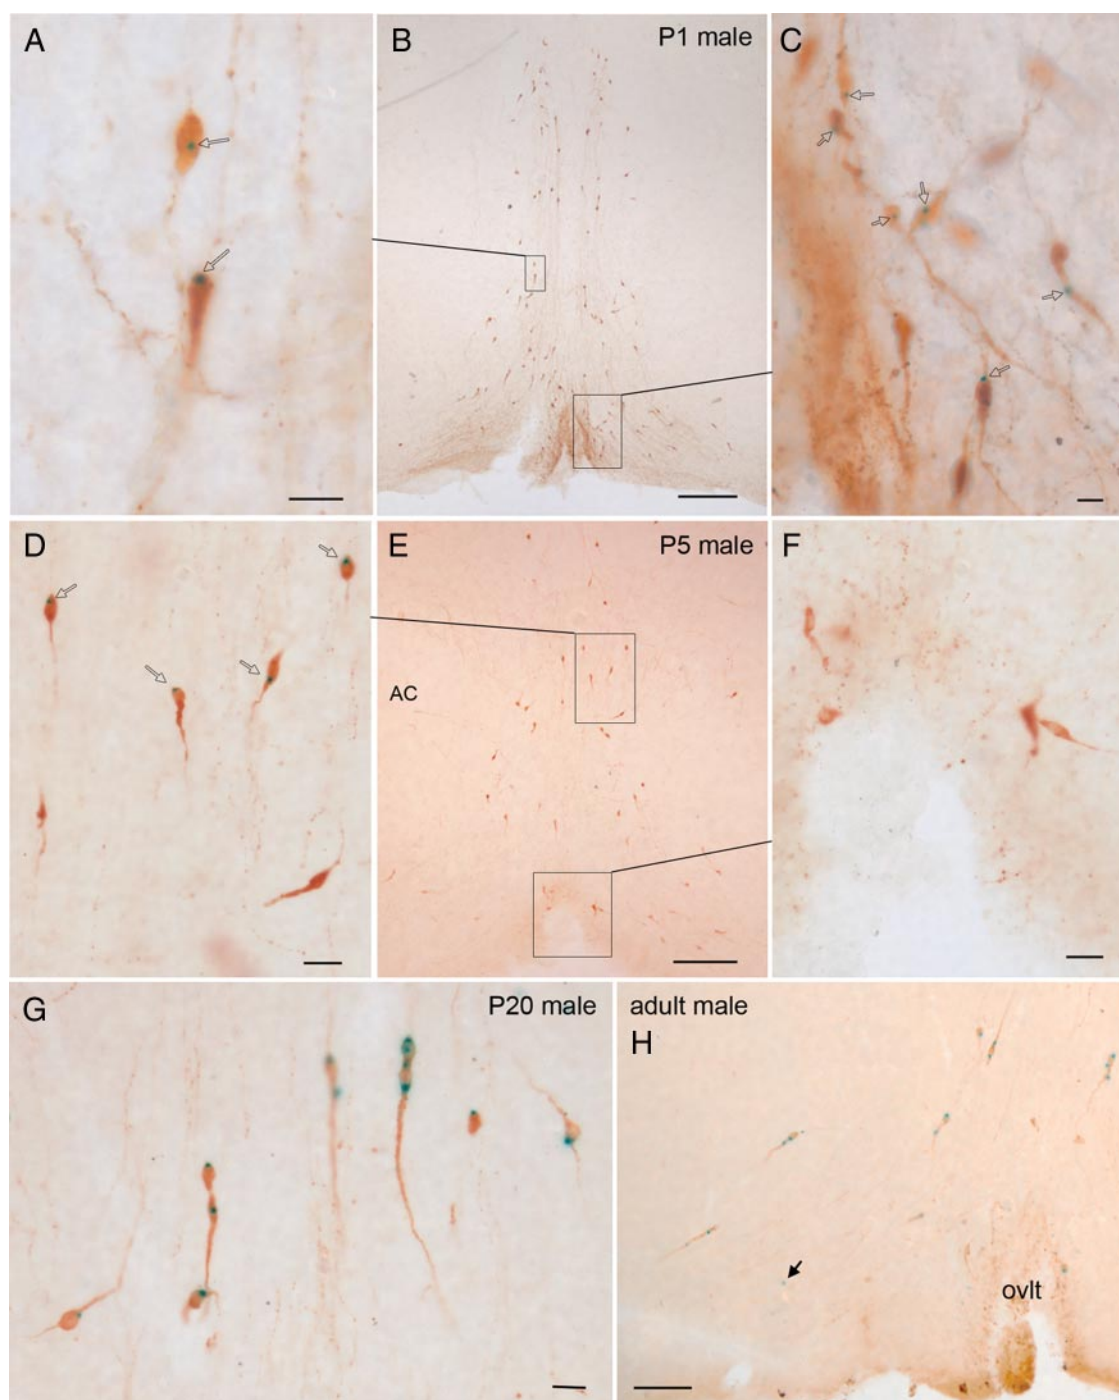

**FIG. 3.** Dual-label immunocytochemistry showing GnRH neurons (brown cytoplasmic staining) expressing Xgal (blue dots). A–C, Coronal sections from a P1 male mouse; B, low-power view of the rPOA, and boxes indicate the higher magnified views in A and C. GnRH neurons (not all in the plane of focus) with Xgal are indicated by arrows. D–F, Coronal sections from a P5 male mouse; E, low-power view of the rPOA, and boxes indicate the higher magnified views in D and F. Note that at this age, the ventral GnRH neurons (F) express little Xgal (none in this case) compared with the more ventrally positioned GnRH neurons (D). G, High-power view of GnRH neurons in the medial septum of a P20 male mouse. Note that all GnRH neurons express Xgal. H, Lower-power view of GnRH neurons in the adult male mouse. Note that nearly all GnRH neurons express Xgal in addition to one cell (arrow) that is not a GnRH neuron. AC, Anterior commissure; OVLT, organum vasculosum of lamina terminalis. Scale bars, 10  $\mu$ m (A, C, F, and G), 20  $\mu$ m (D), 50  $\mu$ m (H), and 200  $\mu$ m (B and E).

cleus of the brainstem. A very few Xgal cells were detected in the granule layer of the cerebellum (Fig. 1C), ventrolateral medulla, and subfornical organ.

The distribution of Xgal-expressing cells was examined in both male and female brains and not found to differ.

### Postnatal development of Gpr54 in mouse forebrain

Outside of the GnRH neurons, the dentate gyrus and CA3 of the hippocampus were the first brain regions found to express Xgal at P5 (Table 1). In contrast, Xgal was not

**TABLE 1.** Expression of Xgal in specific forebrain areas across postnatal development from birth to adulthood

|                               | Birth | P5 | P20 | P30 | Adult |
|-------------------------------|-------|----|-----|-----|-------|
| GnRH neurons                  | ++    | ++ | ++  | ++  | ++    |
| Septum                        | —     | —  | +++ | +++ | +++   |
| Hippocampus (dentate and CA3) | —     | ++ | ++  | ++  | ++++  |
| Posterior hypothalamus        | —     | —  | ++  | ++  | +++   |
| Anteroventral thalamus        | —     | —  | +   | ++  | +++   |
| Habenula                      | —     | —  | +   | +   | ++    |
| Supramammillary nuclei        | —     | —  | —   | +   | +++   |

The numbers of Xgal dots/donuts were recorded for each area: —, no Xgal; +, fewer than 10; ++, 10–100; +++, 100–1000; +++++, more than 1000.

observed in the supramammillary nuclei until P30. In all other brain regions, Xgal was first observed in P20 brains and, as for the other regions, increased in number to reach maximum levels in adults (Table 1). No evidence was found for sex differences or transient expression of Xgal in the forebrain across development.

### Distribution and development of Gpr54 expression in GnRH neurons

Immunocytochemistry for GnRH revealed the typical inverted Y distribution of GnRH neurons within the MS, preoptic area, and anterior hypothalamus (28). The numbers of GnRH neurons detected per section were the same in males and females and not different between animals killed at birth, P1, and P5 or between animals killed at P20 and P30 and as adults (Table 2).

Dual-labeled GnRH neurons were identified by the presence of one or two Xgal dots/donuts within their cytoplasm (Fig. 3). Within the rostral hypothalamus, almost all Xgal-expressing cells were found to be GnRH neurons (Fig. 3H). In adult male ( $n = 4$ ) and diestrous female ( $n = 4$ ) mice, quantitative analysis showed that  $68 \pm 5\%$  of all GnRH neurons contained Xgal (Fig. 3H) and that the percentage of expressing cells was independent of their location within the brain (mean percentage in females was 68% in MS, 71% in rPOA, and 51% in AHA and in males was 65% in MS, 59% in rPOA, and 62% in AHA).

Analysis of brains at the different developmental ages showed that GnRH neurons expressed Xgal from the time of birth onward (Fig. 4) but that the percentage of GnRH

neurons with Xgal increases with postnatal development. In both males and females, less than 40% of GnRH neurons had Xgal staining in P5 and younger mice (Figs. 3, A–F, and 4) compared with 60–70% of P20 (Fig. 3G), P30, and adult GnRH neurons (Fig. 3H). In female mice, the percentage of GnRH neurons with Xgal was significantly lower in birth, P1, and P5 groups compared with all later stages of development ( $P < 0.05$ – $0.001$ ; ANOVA with Student-Newman-Keuls *post hoc*). Similarly, in male mice, the percentage of GnRH neurons with Xgal was significantly lower in the P1 and P5 groups compared with all later stages of development ( $P < 0.05$ ; ANOVA with Student-Newman-Keuls *post hoc*). The percentage of GnRH neurons with Xgal was not different between males and females at any developmental age point. However, there was a trend for GnRH neurons in P1 females to have very few Xgal-positive GnRH neurons (Fig. 4) with the four individual mice having mean Xgal-GnRH coexpression values of 0, 1, 3, and 47%. The latter mouse was reconfirmed to be female by Sry PCR.

In analyzing the patterns of Xgal expression in GnRH neurons, it became apparent that two populations of GnRH neurons existed on an unexpected topographic basis. In individual rPOA sections, an abrupt transition between GnRH neurons with and without Xgal was observed on a dorsal-ventral basis in P1 and, more strikingly, in P5 mice regardless of sex; many MS GnRH neurons had Xgal (Fig. 3D) compared with only very few GnRH neurons located around the organum vasculosum of lamina terminalis (Fig. 3F). This observation prompted a reanalysis of GnRH neurons with dorsal GnRH neurons being defined as those located in the MS and ventral GnRH neurons defined as those located below the level of the anterior commissure at the level of the rPOA and AHA (Fig. 5). This revealed that although Xgal levels in dorsal and ventral GnRH neurons were equivalent at the time of birth, ventral GnRH neurons go on to exhibit a sharp dip in Xgal expression at P1 ( $P < 0.01$ ) and P5 ( $P < 0.01$ ) and that this returns to dorsal levels by P20 (Fig. 5).

**TABLE 2.** Numbers of GnRH neurons per section in male and female mice at different postnatal ages

|        | Birth      | P1         | P5         | P20        | P30        | Adult      |
|--------|------------|------------|------------|------------|------------|------------|
| Male   | $33 \pm 2$ | $38 \pm 4$ | $27 \pm 3$ | $18 \pm 2$ | $15 \pm 2$ | $14 \pm 1$ |
| Female | $32 \pm 5$ | $37 \pm 2$ | $30 \pm 3$ | $18 \pm 2$ | $18 \pm 1$ | $13 \pm 2$ |

Mean  $\pm$  SEM number of GnRH neurons were counted in six sections (two MS, two rPOA, and two AHA) from each mouse for each group. Note that section thickness was 50–60  $\mu$ m for birth, P1, and P5 and 30  $\mu$ m for P20, P30, and adult.



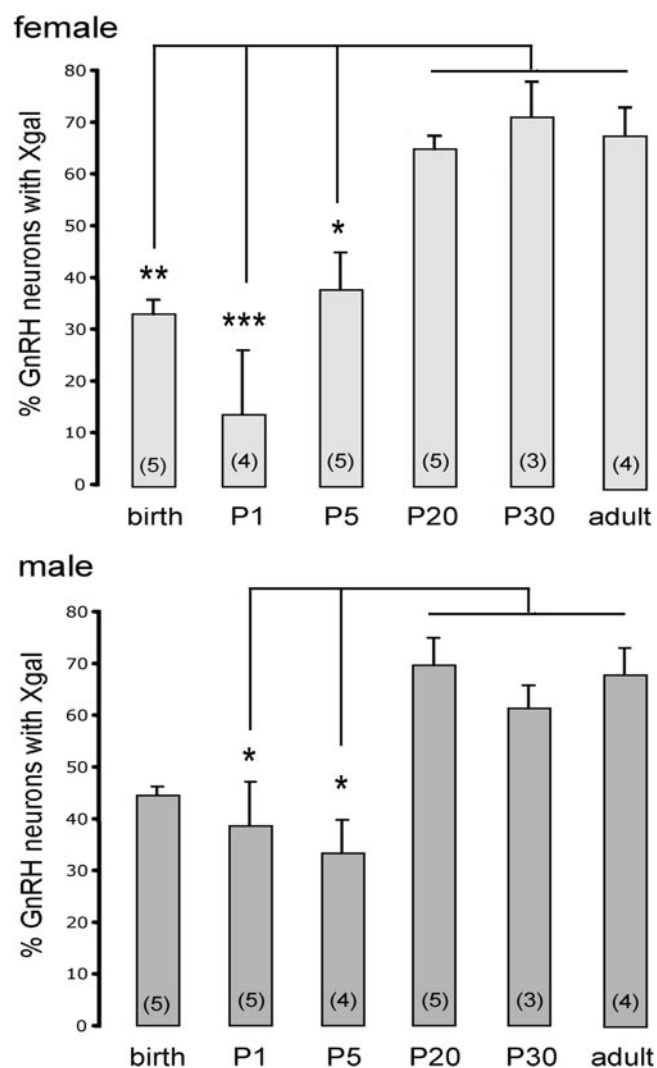

**FIG. 4.** Numbers of GnRH neurons expressing *Gpr54* changes across postnatal development. Histograms show the percentage of female (top) and male (bottom) GnRH neurons expressing Xgal at birth, P1, P5, P20, and P30 and as adults. The numbers of mice analyzed at each time point are given in brackets within each bar. In females, values at birth ( $P < 0.01$ ), P1 ( $P < 0.001$ ), and P5 ( $P < 0.05$ ) were all significantly different compared with P20, P30, and adult values. In males, values at P1 and P5 were all significantly different ( $P < 0.05$ ) compared with P20, P30, and adult values (ANOVA with *post hoc* Student-Newman-Keuls). \*,  $P < 0.05$ ; \*\*,  $P < 0.01$ ; \*\*\*,  $P < 0.001$ .

## Discussion

We demonstrate here the distribution of *Gpr54* expression in the mouse brain using a transgenic knock-in strategy that reports on cells transcribing *Gpr54*. In adult mice, *Gpr54*-expressing cells are located in 14 discrete brain regions with the largest population encountered in the dentate gyrus of the hippocampus. Within the hypothalamus, two populations of *Gpr54*-expressing cells were found; the GnRH neurons and a population located in the posterior periventricular hypothalamus. We found that approximately 40% of GnRH neurons expressed *Gpr54* at birth and that both spatial and temporal changes in

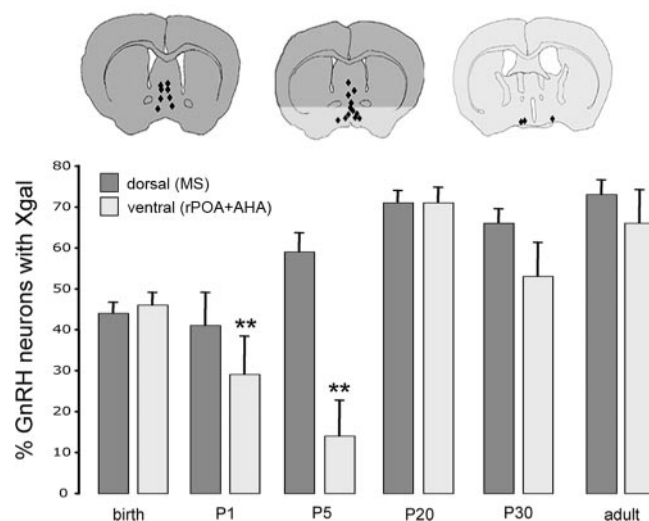

**FIG. 5.** Numbers of GnRH neurons expressing *Gpr54* change depending upon location in the brain across postnatal development. Histograms show the percentage of dorsal (located in MS, dark gray in schematics) and ventral (located in the rPOA and AHA, light gray in schematics) GnRH neurons expressing Xgal across postnatal development. The numbers of animals (male and female) are the same as that shown in Fig. 4. The percentage of ventral GnRH neurons expressing Xgal was significantly ( $P < 0.01$ ) lower than dorsal GnRH neurons at P1 and P5 (paired *t* test). \*\*,  $P < 0.01$ .

*Gpr54* expression by GnRH neurons occurred over the postnatal period.

The knock-in *LacZ* strategy used here has been employed previously to define the distribution of low-abundance G protein-coupled receptors in the mouse brain (15, 16, 29). Because hemizygous *Gpr54* mutant mice have a normal phenotype (21), the expression pattern reported here should represent that of a normal mouse. A previous study has used *in situ* hybridization to map the distribution of *Gpr54* mRNA expression (10) in the rat brain. All of the brain regions identified here in the mouse to express *Gpr54* were also found in rats, including the dentate gyrus, habenula, posterior hypothalamus, PAG, and premammillary nuclei. However, the rat study also identified *Gpr54* mRNA in regions not found in here mice: the hypothalamic arcuate nucleus, zona incerta, amygdala, and ventral tegmental area. Although the limited depiction of hybridized sections in that study did not allow precise anatomical definition, it is apparent that some discrepancy exists between these two mapping studies.

It remains curious that cells in brain regions like the arcuate nucleus and RP3V are not transcribing *Gpr54* in the mouse. These areas contain large numbers of kisspeptin fibers in the mouse (7, 18) and rat (30), and *Gpr54* transcripts have been reported by RT-PCR in mediobasal hypothalamic dissections or arcuate nucleus punches in the rat (31, 32). Furthermore, Shahab and colleagues (13) provided evidence for low levels of *Gpr54* mRNA in the monkey infundibular nucleus using *in situ* hybridization.

At present, it is not clear what underlies these differences; one possibility is that *Gpr54* mRNA expression is different in mouse compared with rat and monkey. Another is that *Gpr54* gene transcription is below the level of sensitivity for the LacZ-Xgal assay system employed. However, it is also possible that the cells in the RP3V and arcuate do not express *Gpr54*, and curiously, we have recently observed that kisspeptin-10 has no effects on the electrical activity of RP3V neurons in the mouse (Ducret E., G. Gaidamaka, and A. Herbison, in preparation).

As yet, there is little information on the functions of *Gpr54* in brain regions outside the hypothalamus. Arai and colleagues (6) have shown that kisspeptin potently modulates the excitability of granule neurons in the dentate gyrus of the hippocampus. We find here that a very large number of *Gpr54*-expressing cells exist in all three layers of the dentate gyrus, as well as the CA3 pyramidal cell layer, suggesting a role for *Gpr54* in hippocampal functioning. We also note substantial populations of *Gpr54*-expressing cells in the anteroventral nucleus of the thalamus, PAG, supramammillary and pontine nuclei, and dorsal cochlear nucleus. These distributions would suggest involvement of *Gpr54* in cortical relays, learning and memory, nociception, temperature regulation, micturition, cardiorespiratory function, sexual behavior, motor control, and auditory functioning. It is noteworthy that no gross physiological deficits, other than infertility, are reported in *Gpr54* mutant mice (21), indicating that *Gpr54* signaling in these nonreproductive neuronal networks is not essential and may be modulatory.

A good topographical overlap exists between *Gpr54*-expressing cells and kisspeptin fiber immunoreactivity in the vicinity of the GnRH neurons, septum, PAG, and posterior hypothalamus of the mouse (7). However, a number of brain regions exist where there are *Gpr54*-expressing cells but no reported kisspeptin fibers (e.g. hippocampus, supramammillary, and pontine nuclei) and, conversely, kisspeptin fibers but no *Gpr54* expression (e.g. amygdala, hypothalamic supraoptic, and paraventricular nuclei) (7). Although these observations may result from technical issues involving assay sensitivity, they may also indicate that other ligands and receptors exist for *Gpr54* and kisspeptin, respectively. It is clear that kisspeptin and *GPR54* are essential, exclusive signaling partners for the regulation of reproduction (17, 33), but this may not be the case for other neuronal networks.

Previous studies using dual *in situ* hybridization and electrophysiology have indicated that between 60 and 90% of adult rodent GnRH neurons express *Gpr54* (11, 12, 34–36). The present study, using a different approach, found that approximately 70% of GnRH neurons were

transcribing *Gpr54* in adult mice and that this was not dependent upon sex or anatomical location with the hypothalamus and septum. This agrees with studies that have found similar kisspeptin response rates from septal (36) and rPOA (34) located GnRH neurons and GnRH neurons of both sexes (34). It was notable in the present study that essentially all Xgal-positive neurons in the rostral hypothalamus were GnRH neurons. A small number of Xgal-positive, non-GnRH neurons were found lateral to GnRH neurons in the ventral-most aspect of the intermediate LS. This finding suggests that *Gpr54* receptors are expressed exclusively by GnRH neurons within the rostral hypothalamus. Certainly, before P5, the only neurons in the brain transcribing *Gpr54* are GnRH neurons. Indirect effects of kisspeptin on adult GnRH neurons have, nevertheless, been reported in 300- $\mu$ m-thick coronal brain slices (37) suggesting that neuronal somata or terminals nearby GnRH neurons express receptors responsive to kisspeptin. It is also noteworthy that kisspeptin-*Gpr54* signaling can modulate GnRH release from the median eminence (38). The absence of *Gpr54*-expressing cells in the median eminence itself suggests that any *Gpr54* in this area is most likely presynaptic in nature located on GnRH nerve terminals.

We find here that 30–40% of GnRH neurons are actively transcribing *Gpr54* at the time of birth. Constantin and co-workers (39) have recently reported that *Gpr54* mRNA is found in the nasal region of d-13.5 mouse embryos and that it is likely to be expressed by some GnRH neurons at this time. Together, these studies indicate that subpopulations of GnRH neurons are capable of responding to kisspeptin throughout their prenatal development. The physiological significance of this is not known. The finding here that many GnRH neurons are expressing *Gpr54* at birth may be relevant to the recent observation that male *Gpr54* knockout mice exhibit female-like sex differences in brain structure (20). Although multiple explanations exist for this phenomenon, one possibility is that kisspeptin-*Gpr54* signaling at the level of the GnRH neuron is necessary for early postnatal testosterone secretion required to generate male-like sex differences in the brain (20).

We have uncovered here two patterns of *Gpr54* gene expression in postnatal GnRH neurons, the first being an overall increase in the percentage of *Gpr54*-expressing GnRH neurons across postnatal development and the second being a down-regulation of *Gpr54* gene transcription in ventral GnRH neurons after birth. With respect to the former, we had shown previously that the majority of GnRH neurons express *Gpr54* mRNA at P18 (12). This is confirmed here and extended to show that the percentage of *Gpr54*-expressing GnRH neurons increases from ap-



proximately 40% to 70% between P5 and P20. Whether GnRH neurons are exposed to kisspeptin in the early prepubertal period is unknown at present. We have previously suggested that a two-step mechanism of kisspeptin-Gpr54 signaling occurs at the time of puberty in GnRH neurons; this involves a maturation of Gpr54 regulation of GnRH neuron firing (12) and, critically, the expression of kisspeptin in fibers innervating GnRH neurons (18). The finding here that *Gpr54* gene transcription is occurring in adult-like numbers of GnRH neurons at P20 further reinforces the view that GnRH neurons are likely to be sensitive to kisspeptin well in advance of puberty onset.

The rPOA-specific down-regulation of Gpr54 transcription in the first postnatal week is curious and unexpected. Although Gpr54 expression in the dorsal (MS) GnRH neurons exhibits a stable gradual increase across postnatal development, expression in ventral (rPOA/AHA) GnRH neurons falls precipitously in the first postnatal week but recovers to MS levels by P20. Apart from the observation that the rPOA GnRH neuron subpopulation is responsible for the preovulatory GnRH surge in mice, the roles of topographically defined subpopulations of GnRH neurons remain unknown (28). Recent investigations show that GnRH migration occurs in an inside-out manner such that the first-born GnRH neurons are more likely to reside in the MS, whereas later-born GnRH neurons migrate past them into the rPOA (40). However, the roles of MS *vs.* rPOA GnRH neurons in the prepubertal period remain completely unexplored.

In summary, we provide here a detailed description of Gpr54-expressing cells in mammalian brain and show that multiple neuronal networks are likely to use this G protein-coupled receptor from as early as P5. This work provides an anatomical template for the examination of kisspeptin and Gpr54 actions outside the GnRH neuron system. We also show that large numbers of GnRH neurons express Gpr54 from birth and that Gpr54 expression varies in both temporal and spatial dimensions across postnatal development, the physiological significance of which remains unclear at present.

## Acknowledgments

Address all correspondence and requests for reprints to: Allan E. Herbison, Centre for Neuroendocrinology, Department of Physiology, University of Otago School of Medical Sciences, P.O. Box 913, Dunedin, New Zealand. E-mail: allan.herbison@stonebow.otago.ac.nz.

This work was supported by the New Zealand Marsden Fund, United Kingdom Biotechnology and Biological Sciences Research Council Grant BB/C000386/1, and the Ford Physiology Fund (W.H.C.).

Disclosure Summary: A.E.H., X.d.A.d.T., and W.H.C. have nothing to disclose. J.D. is an employee of Takeda Cambridge.

## References

- Colledge WH 2009 Kisspeptins and GnRH neuronal signalling. *Trends Endocrinol Metab* 20:115–121
- Clarkson J, Herbison AE 2009 Oestrogen, kisspeptin, GPR54 and the pre-ovulatory luteinising hormone surge. *J Neuroendocrinol* 21:305–311
- Popa SM, Clifton DK, Steiner RA 2008 The role of kisspeptins and GPR54 in the neuroendocrine regulation of reproduction. *Annu Rev Physiol* 70:213–238
- Kauffman AS, Gottsch ML, Roa J, Byquist AC, Crown A, Clifton DK, Hoffman GE, Steiner RA, Tena-Sempere M 2007 Sexual differentiation of Kiss1 gene expression in the brain of the rat. *Endocrinology* 148:1774–1783
- Kotani M, Detheux M, Vandenbogaerde A, Communi D, Vanderwinden JM, Le Poul E, Brézillon S, Tyldesley R, Suarez-Huerta N, Vandeput F, Blanpain C, Schiffmann SN, Vassart G, Parmentier M 2001 The metastasis suppressor gene KiSS-1 encodes kisspeptins, the natural ligands of the orphan G protein-coupled receptor GPR54. *J Biol Chem* 276:34631–34636
- Arai AC, Xia YF, Suzuki E, Kessler M, Civelli O, Nothacker HP 2005 Cancer metastasis-suppressing peptide metastatin upregulates excitatory synaptic transmission in hippocampal dentate granule cells. *J Neurophysiol* 94:3648–3652
- Clarkson J, d'Anglemont de Tassigny X, Colledge WH, Caraty A, Herbison AE 2009 Distribution of kisspeptin neurones in the adult female mouse brain. *J Neuroendocrinol* 21:673–682
- Mikkelsen JD, Simonneaux V 2009 The neuroanatomy of the kisspeptin system in the mammalian brain. *Peptides* 30:26–33
- Muir AI, Chamberlain L, Elshourbagy NA, Michalovich D, Moore DJ, Calamari A, Szekeres PG, Sarau HM, Chambers JK, Murdock P, Steplewski K, Shabon U, Miller JE, Middleton SE, Darker JG, Larminie CG, Wilson S, Bergsma DJ, Emson P, Faull R, Philpott KL, Harrison DC 2001 AXOR12, a novel human G protein-coupled receptor, activated by the peptide KiSS-1. *J Biol Chem* 276:28969–28975
- Lee DK, Nguyen T, O'Neill GP, Cheng R, Liu Y, Howard AD, Coulombe N, Tan CP, Tang-Nguyen AT, George SR, O'Dowd BF 1999 Discovery of a receptor related to the galanin receptors. *FEBS Lett* 446:103–107
- Irwig MS, Fraley GS, Smith JT, Acohido BV, Popa SM, Cunningham MJ, Gottsch ML, Clifton DK, Steiner RA 2004 Kisspeptin activation of gonadotropin releasing hormone neurons and regulation of KiSS-1 mRNA in the male rat. *Neuroendocrinology* 80:264–272
- Han SK, Gottsch ML, Lee KJ, Popa SM, Smith JT, Jakawich SK, Clifton DK, Steiner RA, Herbison AE 2005 Activation of gonadotropin-releasing hormone (GnRH) neurons by kisspeptin as a neuroendocrine switch for the onset of puberty. *J Neurosci* 25:11349–11356
- Shahab M, Mastronardi C, Seminara SB, Crowley WF, Ojeda SR, Plant TM 2005 Increased hypothalamic GPR54 signaling: a potential mechanism for initiation of puberty in primates. *Proc Natl Acad Sci USA* 102:2129–2134
- Allen JP, Hathway GJ, Clarke NJ, Jowett MI, Topps S, Kendrick KM, Humphrey PP, Wilkinson LS, Emson PC 2003 Somatostatin receptor 2 knockout/lacZ knockin mice show impaired motor coordination and reveal sites of somatostatin action within the striatum. *Eur J Neurosci* 17:1881–1895
- Shimazoe T, Morita M, Ogiwara S, Kojiya T, Goto J, Kamakura M, Moriya T, Shinohara K, Takiguchi S, Kono A, Miyasaka K, Funakoshi A, Ikeda M 2008 Cholecystokinin-A receptors regulate photic input pathways to the circadian clock. *FASEB J* 22:1479–1490
- Isensee J, Meoli L, Zazzu V, Nabzdyk C, Witt H, Soewarto D, Effertz

- K, Fuchs H, Gailus-Durner V, Busch D, Adler T, de Angelis MH, Irgang M, Otto C, Noppinger PR 2009 Expression pattern of G protein-coupled receptor 30 in LacZ reporter mice. *Endocrinology* 150:1722–1730
17. Messenger S, Chatzidaki EE, Ma D, Hendrick AG, Zahn D, Dixon J, Thresher RR, Malinge I, Lomet D, Carlton MB, Colledge WH, Caraty A, Aparicio SA 2005 Kisspeptin directly stimulates gonadotropin-releasing hormone release via G protein-coupled receptor 54. *Proc Natl Acad Sci USA* 102:1761–1766
18. Clarkson J, Herbison AE 2006 Postnatal development of kisspeptin neurons in mouse hypothalamus; sexual dimorphism and projections to gonadotropin-releasing hormone neurons. *Endocrinology* 147:5817–5825
19. Clarkson J, Boon WC, Simpson ER, Herbison AE 2009 Postnatal development of an estradiol-kisspeptin positive feedback mechanism implicated in puberty onset. *Endocrinology* 150:3214–3220
20. Kauffman AS, Park JH, McPhie-Lalmansingh AA, Gottsch ML, Bodo C, Hohmann JG, Pavlova MN, Rohde AD, Clifton DK, Steiner RA, Rissman EF 2007 The kisspeptin receptor GPR54 is required for sexual differentiation of the brain and behavior. *J Neurosci* 27:8826–8835
21. Seminara SB, Messenger S, Chatzidaki EE, Thresher RR, Acierno JS Jr, Shagoury JK, Bo-Abbas Y, Kuohung W, Schwino KM, Hendrick AG, Zahn D, Dixon J, Kaiser UB, Slaugenhaupt SA, Gusella JF, O'Rahilly S, Carlton MB, Crowley Jr WF, Aparicio SA, Colledge WH 2003 The GPR54 gene as a regulator of puberty. *N Engl J Med* 349:1614–1627
22. Pronina T, Ugrumov M, Calas A, Seif I, Tramu G 2003 Influence of monoamines on differentiating gonadotropin-releasing hormone neurones in foetal mice. *J Neuroendocrinol* 15:925–932
23. Franklin KBJ, Paxinos G 1997 The mouse brain in stereotaxic coordinates. San Diego: Academic Press
24. Herbison AE, Porteous R, Pape JR, Mora JM, Hurst PR 2008 Gonadotropin-releasing hormone neuron requirements for puberty, ovulation, and fertility. *Endocrinology* 149:597–604
25. Skynner MJ, Slater R, Sim JA, Allen ND, Herbison AE 1999 Promoter transgenics reveal multiple gonadotropin-releasing hormone-1-expressing cell populations of different embryological origin in mouse brain. *J Neurosci* 19:5955–5966
26. Friedrich Jr VL, Holstein GR, Li X, Gow A, Kelley KA, Lazzarini RA 1993 Intracellular distribution of transgenic bacterial  $\beta$ -galactosidase in central nervous system neurons and neuroglia. *J Neurosci Res* 36:88–98
27. Thanky NR, Son JH, Herbison AE 2002 Sex differences in the regulation of tyrosine hydroxylase gene transcription by estrogen in the locus coeruleus of TH9-LacZ transgenic mice. *Brain Res Mol Brain Res* 104:220–226
28. Herbison AE 2006 Physiology of the GnRH neuronal network. In: Neill JD, ed. *Knobil and Neill's physiology of reproduction*. 3rd ed. San Diego: Academic Press; 1415–1482
29. Allen JP, Canty AJ, Schulz S, Humphrey PP, Emson PC, Young HM 2002 Identification of cells expressing somatostatin receptor 2 in the gastrointestinal tract of Sstr2 knockout/lacZ knockin mice. *J Comp Neurol* 454:329–340
30. Yamada S, Uenoyama Y, Kinoshita M, Iwata K, Takase K, Matsui H, Adachi S, Inoue K, Maeda KI, Tsukamura H 2007 Inhibition of metastin (kisspeptin-54)-GPR54 signaling in the arcuate nucleus-median eminence region during lactation in rats. *Endocrinology* 148:2226–2232
31. Kinoshita M, Tsukamura H, Adachi S, Matsui H, Uenoyama Y, Iwata K, Yamada S, Inoue K, Ohtaki T, Matsumoto H, Maeda K 2005 Involvement of central metastin in the regulation of preovulatory luteinizing hormone surge and estrous cyclicity in female rats. *Endocrinology* 146:4431–4436
32. Kinsey-Jones JS, Li XF, Knox AM, Wilkinson ES, Zhu XL, Chaudhary AA, Milligan SR, Lightman SL, O'Byrne KT 2009 Down-regulation of hypothalamic kisspeptin and its receptor, Kiss1r, mRNA expression is associated with stress-induced suppression of luteinising hormone secretion in the female rat. *J Neuroendocrinol* 21:20–29
33. d'Anglemont de Tassigny X, Fagg LA, Dixon JP, Day K, Leitch HG, Hendrick AG, Zahn D, Franceschini I, Caraty A, Carlton MB, Aparicio SA, Colledge WH 2007 Hypogonadotropic hypogonadism in mice lacking a functional Kiss1 gene. *Proc Natl Acad Sci USA* 104:10714–10719
34. Liu X, Lee K, Herbison AE 2008 Kisspeptin excites gonadotropin-releasing hormone neurons through a phospholipase C/calcium-dependent pathway regulating multiple ion channels. *Endocrinology* 149:4605–4614
35. Zhang C, Roepke TA, Kelly MJ, Rønnekleiv OK 2008 Kisspeptin depolarizes gonadotropin-releasing hormone neurons through activation of TRPC-like cationic channels. *J Neurosci* 28:4423–4434
36. Dumalska I, Wu M, Morozova E, Liu R, van den Pol A, Alreja M 2008 Excitatory effects of the puberty-initiating peptide kisspeptin and group I metabotropic glutamate receptor agonists differentiate two distinct subpopulations of gonadotropin-releasing hormone neurons. *J Neurosci* 28:8003–8013
37. Pielecka-Fortuna J, Chu Z, Moenter SM 2008 Kisspeptin acts directly and indirectly to increase gonadotropin-releasing hormone neuron activity and its effects are modulated by estradiol. *Endocrinology* 149:1979–1986
38. d'Anglemont de Tassigny X, Fagg LA, Carlton MB, Colledge WH 2008 Kisspeptin can stimulate gonadotropin-releasing hormone (GnRH) release by a direct action at GnRH nerve terminals. *Endocrinology* 149:3926–3932
39. Constantin S, Caligioni CS, Stojilkovic S, Wray S 2009 Kisspeptin-10 facilitates a plasma membrane-driven calcium oscillator in gonadotropin-releasing hormone-1 neurons. *Endocrinology* 150:1400–1412
40. Jasoni CL, Porteous RW, Herbison AE 2009 Anatomical location of mature GnRH neurons corresponds with their birthdate in the developing mouse. *Dev Dyn* 238:524–531
41. Paxinos G, Franklin KBJ 2004 The mouse brain in stereotaxic coordinates. San Diego: Academic Press
